# Supplementary material for: Label-Free LC-MSe in Tissue and Serum Reveals Protein Networks Underlying Differences between Benign and Malignant Serous Ovarian Tumors
Source: PLoS One. 2014 Sep 29;9(9):e108046. doi: 10.1371/journal.pone.0108046 (PMC4180266; doi:10.1371/journal.pone.0108046)
Supplement: Table S3 — Serum and tissue transcriptional regulation network list. The column ‘GO processes’ states the different biological processes associated with the network. The total number of objects in the network is indicated in the ‘Total nodes’ column. The p-values represent the probability of intersection between the experimental signature and the prebuilt content in MetaCore. The column ‘zScore’ gives the level of saturation of the networks taking into account the size of the database, the number of objects in the subnetwork and the number of objects in the signature used to construct the network. The higher the z-score the more saturated a subnetwork is. The transcriptional regulation networks are ranked according to p-value. (XLS) [file pone.0108046.s003.xls]

## Sheet: Serum
Table S3. Serum transcriptional regulation network list.
Serum transcriptional regulation network list ranked according to p-value. The column ‘GO processes’ states the different biological processes associated with the network.
The total number of objects in the network is indicated in the ‘Total nodes’ column.
The p-values represent the probability of intersection between the experimental signature and the prebuilt content in MetaCore.
The column ‘z-score’ gives the level of saturation of the networks taking into account the size of the database, the number of objects in the subnetwork and the number of objects in the signature used to construct the network.
The higher the z-score the more saturated a subnetwork is.
#	Network	GO processes	Total nodes	p-value	z-score
1	GCR-alpha	acute inflammatory response (58.3%; 6.148e-14), acute-phase response (50.0%; 4.124e-13), response to organic cyclic compound (83.3%; 1.289e-11), response to steroid hormone stimulus (66.7%; 3.714e-10), response to endogenous stimulus (83.3%; 8.443e-10)	12	1.99e-13	10.93
2	HNF4-alpha	response to wounding (100.0%; 4.888e-14), phospholipid efflux (36.4%; 8.339e-10), high-density lipoprotein particle remodeling (36.4%; 1.244e-09), acute inflammatory response (45.5%; 1.488e-09), protein-lipid complex assembly (36.4%; 2.006e-09)	11	3.67e-12	10.4
3	HNF3-beta	response to wounding (87.5%; 2.586e-08), acute inflammatory response (50.0%; 4.578e-08), regulation of response to stress (75.0%; 2.566e-07), regulation of response to external stimulus (62.5%; 5.518e-07), response to stress (100.0%; 5.946e-07)	8	1.63e-08	8.66
4	C/EBPbeta	acute-phase response (100.0%; 1.184e-18), acute inflammatory response (100.0%; 7.928e-17), inflammatory response (100.0%; 7.359e-12), response to wounding (100.0%; 3.416e-09), defense response (100.0%; 4.613e-09)	7	2.4e-07	8
5	HNF1-alpha	reverse cholesterol transport (57.1%; 2.138e-10), sterol transport (57.1%; 3.510e-09), cholesterol transport (57.1%; 3.510e-09), negative regulation of very-low-density lipoprotein particle remodeling (42.9%; 1.771e-08), organic hydroxy compound transport (57.1%; 2.067e-08)	7	2.4e-07	8
6	COUP-TFI	negative regulation of very-low-density lipoprotein particle remodeling (42.9%; 1.771e-08), regulation of very-low-density lipoprotein particle remodeling (42.9%; 2.430e-08), negative regulation of lipase activity (42.9%; 5.339e-08), negative regulation of hydrolase activity (71.4%; 5.684e-08), phospholipid efflux (42.9%; 7.408e-08)	7	2.4e-07	8
7	SP1	regulation of cholesterol transport (42.9%; 7.568e-07), regulation of sterol transport (42.9%; 7.568e-07), acute-phase response (42.9%; 7.933e-07), response to endogenous stimulus (85.7%; 2.092e-06), platelet degranulation (42.9%; 3.896e-06)	7	2.4e-07	8
8	c-Jun	regulation of cholesterol transport (50.0%; 4.333e-07), regulation of sterol transport (50.0%; 4.333e-07), phosphatidylcholine metabolic process (50.0%; 1.025e-06), ethanolamine-containing compound metabolic process (50.0%; 2.114e-06), response to lipid (83.3%; 2.613e-06)	6	3.39e-06	7.29
9	C/EBPalpha	acute inflammatory response (83.3%; 1.972e-11), acute-phase response (66.7%; 9.384e-10), response to wounding (100.0%; 5.546e-08), inflammatory response (83.3%; 6.610e-08), response to organic cyclic compound (83.3%; 2.689e-06)	6	3.39e-06	7.29
10	STAT1	response to lipopolysaccharide (83.3%; 1.888e-08), response to molecule of bacterial origin (83.3%; 2.445e-08), regulation of complement activation (50.0%; 3.053e-08), regulation of protein activation cascade (50.0%; 3.053e-08), defense response (100.0%; 7.172e-08)	6	3.39e-06	7.29
11	STAT3	acute-phase response (100.0%; 4.524e-16), acute inflammatory response (100.0%; 1.625e-14), inflammatory response (100.0%; 2.881e-10), response to wounding (100.0%; 5.546e-08), defense response (100.0%; 7.172e-08)	6	3.39e-06	7.29
12	ESR1 (nuclear)	platelet degranulation (66.7%; 7.977e-09), platelet activation (66.7%; 3.724e-07), acute-phase response (50.0%; 4.542e-07), exocytosis (66.7%; 5.983e-07), regulation of catalytic activity (100.0%; 8.707e-07)	6	3.39e-06	7.29
13	p53	response to nutrient (83.3%; 7.134e-09), response to organic nitrogen (100.0%; 1.868e-08), response to nitrogen compound (100.0%; 2.477e-08), response to wounding (100.0%; 5.546e-08), response to vitamin (66.7%; 5.559e-08)	6	3.39e-06	7.29
14	HNF4	triglyceride homeostasis (60.0%; 7.403e-08), acylglycerol homeostasis (60.0%; 7.403e-08), lipid homeostasis (60.0%; 2.033e-06), phospholipid homeostasis (40.0%; 6.008e-06), negative regulation of very-low-density lipoprotein particle remodeling (40.0%; 6.715e-06)	5	4.57e-05	6.51
15	COUP-TFII	negative regulation of very-low-density lipoprotein particle remodeling (75.0%; 2.027e-09), regulation of very-low-density lipoprotein particle remodeling (75.0%; 2.782e-09), negative regulation of lipase activity (75.0%; 6.116e-09), phospholipid efflux (75.0%; 8.489e-09), high-density lipoprotein particle remodeling (75.0%; 1.141e-08)	4	0.00059	5.63
16	RXRA	response to nutrient (100.0%; 7.366e-08), response to nutrient levels (100.0%; 4.331e-07), response to extracellular stimulus (100.0%; 5.919e-07), regeneration (75.0%; 5.470e-06), response to wounding (100.0%; 1.458e-05)	4	0.00059	5.63
17	NF-kB	response to nutrient (100.0%; 7.366e-08), response to nutrient levels (100.0%; 4.331e-07), inflammatory response (100.0%; 4.391e-07), response to extracellular stimulus (100.0%; 5.919e-07), response to hormone stimulus (100.0%; 1.155e-05)	4	0.00059	5.63
18	RelA (p65 NF-kB subunit)	regulation of inflammatory response (75.0%; 1.195e-05), negative regulation of insulin receptor signaling pathway (50.0%; 1.401e-05), negative regulation of cellular response to insulin stimulus (50.0%; 1.655e-05), defense response (100.0%; 1.731e-05), regulation of insulin receptor signaling pathway (50.0%; 2.544e-05)	4	0.00059	5.63
19	Androgen receptor	acute-phase response (50.0%; 4.890e-05), response to peptide hormone stimulus (75.0%; 9.852e-05), response to peptide (75.0%; 1.044e-04), cellular response to hormone stimulus (75.0%; 1.303e-04), regulation of growth (75.0%; 1.441e-04)	4	0.00059	5.63
20	ERR1	regulation of triglyceride catabolic process (66.7%; 2.724e-06), phospholipid efflux (66.7%; 5.128e-06), high-density lipoprotein particle remodeling (66.7%; 6.224e-06), protein-lipid complex assembly (66.7%; 7.849e-06), plasma lipoprotein particle assembly (66.7%; 7.849e-06)	3	0.00731	4.59

## Sheet: Tissue
Table S3. Tissue transcriptional regulation network list
Tissue transcriptional regulation network list ranked according to p-value. The column ‘GO processes’ states the different biological processes associated with the network.
The total number of objects in the network is indicated in the ‘Total nodes’ column.
The p-values represent the probability of intersection between the experimental signature and the prebuilt content in MetaCore.
The column ‘z-score’ gives the level of saturation of the networks taking into account the size of the database, the number of objects in the subnetwork and the number of objects in the signature used to construct the network.
The higher the z-score the more saturated a subnetwork is.
#	Network	GO processes	Total nodes	p-value	z-score
1	c-Myc	glucose catabolic process (14.9%; 1.063e-14), glycolysis (13.4%; 6.997e-14), hexose catabolic process (14.9%; 7.876e-14), monosaccharide catabolic process (14.9%; 1.582e-13), monosaccharide biosynthetic process (13.4%; 1.583e-13)	67	2.17e-40	12.74
2	CREB1	translational elongation (22.9%; 1.077e-10), macromolecular complex disassembly (22.9%; 1.077e-10), viral reproductive process (34.3%; 1.194e-10), protein localization to organelle (31.4%; 1.706e-10), protein transport (42.9%; 2.763e-10)	35	2.34e-18	8.54
3	SP1	response to organic substance (63.9%; 4.075e-12), macromolecular complex subunit organization (47.2%; 1.675e-11), protein complex subunit organization (41.7%; 5.858e-11), response to chemical stimulus (72.2%; 7.314e-11), macromolecular complex assembly (41.7%; 1.362e-10)	36	3.43e-17	8.26
4	GCR-alpha	cellular localization (53.3%; 1.044e-09), macromolecular complex subunit organization (46.7%; 1.282e-09), establishment of localization in cell (50.0%; 1.359e-09), protein folding (26.7%; 2.108e-09), platelet degranulation (20.0%; 6.334e-09)	30	6.47e-15	7.66
5	ESR1 (nuclear)	platelet degranulation (20.7%; 5.087e-09), glycolysis (17.2%; 8.922e-09), oxidation-reduction process (41.4%; 1.274e-08), generation of precursor metabolites and energy (31.0%; 2.099e-08), glucose catabolic process (17.2%; 3.001e-08)	29	2.34e-14	7.51
6	YY1	protein complex subunit organization (54.5%; 9.494e-11), macromolecular complex subunit organization (54.5%; 1.988e-09), translational elongation (27.3%; 7.884e-09), viral transcription (22.7%; 2.258e-08), viral genome expression (22.7%; 2.258e-08)	22	4.23e-11	6.55
7	Androgen receptor	regulation of cell death (54.2%; 4.566e-09), transport (66.7%; 1.334e-07), establishment of localization (66.7%; 1.701e-07), organic substance transport (50.0%; 2.494e-07), regulation of apoptotic process (45.8%; 4.151e-07)	24	4.23e-11	6.55
8	HIF1A	glycolysis (33.3%; 4.465e-14), glucose catabolic process (33.3%; 2.539e-13), hexose catabolic process (33.3%; 1.018e-12), monosaccharide catabolic process (33.3%; 1.654e-12), single-organism carbohydrate catabolic process (33.3%; 2.062e-11)	21	4.79e-10	6.21
9	p53	establishment of localization in cell (61.1%; 1.367e-08), chaperone-mediated protein folding (22.2%; 2.296e-08), protein folding (33.3%; 5.222e-08), nucleocytoplasmic transport (33.3%; 5.687e-08), nuclear transport (33.3%; 6.315e-08)	18	1.71e-08	5.66
10	c-Jun	response to stress (72.2%; 2.815e-07), cellular component organization (77.8%; 3.463e-07), system development (77.8%; 3.713e-07), cellular component organization or biogenesis (77.8%; 5.300e-07), developmental process (83.3%; 6.672e-07)	18	1.71e-08	5.66
11	Oct-3/4	glycolysis (23.5%; 7.920e-08), glucose catabolic process (23.5%; 2.081e-07), hexose catabolic process (23.5%; 4.516e-07), monosaccharide catabolic process (23.5%; 5.926e-07), ATP metabolic process (29.4%; 1.821e-06)	17	1.71e-08	5.66
12	C/EBPbeta	regulation of apoptotic process (56.2%; 5.250e-07), regulation of programmed cell death (56.2%; 5.688e-07), regulation of cell death (56.2%; 7.699e-07), interaction with host (37.5%; 2.337e-06), symbiosis, encompassing mutualism through parasitism (37.5%; 3.352e-06)	16	5.53e-08	5.47
13	ZNF143	cellular protein complex disassembly (25.0%; 3.442e-05), protein complex disassembly (25.0%; 3.697e-05), negative regulation of apoptotic process (41.7%; 6.107e-05), negative regulation of programmed cell death (41.7%; 6.474e-05), translational elongation (25.0%; 7.356e-05)	12	5.61e-06	4.65
14	HSF1	response to topologically incorrect protein (50.0%; 1.908e-10), chaperone-mediated protein folding (33.3%; 3.741e-09), response to unfolded protein (41.7%; 1.545e-08), protein folding (41.7%; 1.955e-07), response to organic substance (75.0%; 2.320e-06)	12	5.61e-06	4.65
15	E2F1	establishment of localization in cell (58.3%; 1.052e-05), negative regulation of RNA metabolic process (50.0%; 1.286e-05), negative regulation of nucleobase-containing compound metabolic process (50.0%; 2.132e-05), negative regulation of nitrogen compound metabolic process (50.0%; 2.447e-05), cellular localization (58.3%; 2.896e-05)	12	5.61e-06	4.65
16	ETS1	collagen fibril organization (25.0%; 1.725e-06), response to acid (33.3%; 5.791e-06), single-organism metabolic process (75.0%; 1.243e-05), cellular component movement (50.0%; 1.808e-05), carbohydrate derivative catabolic process (41.7%; 1.942e-05)	12	5.61e-06	4.65
17	SP3	collagen fibril organization (33.3%; 7.408e-09), collagen biosynthetic process (16.7%; 7.255e-06), organ development (75.0%; 7.482e-06), extracellular matrix organization (33.3%; 9.773e-06), extracellular structure organization (33.3%; 9.915e-06)	12	5.61e-06	4.65
18	C/EBPalpha	establishment of localization in cell (63.6%; 4.704e-06), nucleocytoplasmic transport (36.4%; 7.166e-06), nuclear transport (36.4%; 7.685e-06), macromolecule metabolic process (100.0%; 8.374e-06), organic substance transport (63.6%; 1.089e-05)	11	1.75e-05	4.43
19	ATF-2	response to stress (81.8%; 3.937e-06), oxygen transport (18.2%; 4.090e-05), gas transport (18.2%; 7.542e-05), erythrocyte development (18.2%; 1.350e-04), blood coagulation (36.4%; 1.977e-04)	11	1.75e-05	4.43
20	RelA (p65 NF-kB subunit)	response to endogenous stimulus (63.6%; 6.500e-06), response to organic nitrogen (54.5%; 6.892e-06), ATP metabolic process (36.4%; 8.120e-06), response to nitrogen compound (54.5%; 9.041e-06), developmental process (90.9%; 1.290e-05)	11	1.75e-05	4.43
